# Supplementary material for: Combined experimental and simulation study on H2 storage in oxygen and nitrogen co-doped activated carbon derived from biomass waste: superior pore size and surface chemistry development
Source: Royal Society of Chemistry journal article supplement (doi:10.1039/d3ra06720c), 2023-01-01
Supplement: d3ra06720c1.pdf [file d3ra06720c1.pdf]

*Supplementary Information*

**Combined experimental and molecular simulation study on H<sub>2</sub> storage in oxygen and nitrogen co-doped activated carbon derived from biomass waste: Superior pore size and surface chemistry development**

by

Suphakorn Anuchitsakol,<sup>a</sup> Waralee Dilokekunakul,<sup>b</sup> Numphueng Khongtor,<sup>c</sup>  
Somboon Chaemchuen,<sup>d</sup> Nikom Klomkliang <sup>\*a,c</sup>

<sup>a</sup> School of Chemical Engineering, Suranaree University of Technology, Nakhon Ratchasima  
30000, Thailand

<sup>b</sup> Aachener Verfahrenstechnik - Chemical Process Engineering, RWTH Aachen University,  
Aachen 52074, Germany

<sup>c</sup> Institute of Research and Development, Suranaree University of Technology, Nakhon  
Ratchasima 30000, Thailand

<sup>d</sup> State Key Laboratory of Advanced Technology for Materials Synthesis and Processing,  
Wuhan University of Technology, Wuhan 430070, China.

<sup>e</sup> Research Unit of Adsorption, Catalysis & Energy Storage, Suranaree University of  
Technology, Nakhon Ratchasima 30000, Thailand

\* Corresponding author: E-mail address: [nikom.klo@sut.ac.th](mailto:nikom.klo@sut.ac.th)

**Table S1.** Molecular parameters for H<sub>2</sub> and functional groups used in this work.

| <b>Fluid/Functional group</b> | <b><math>\epsilon/k_B</math> (K)</b> | <b><math>\sigma</math> (nm)</b> | <b>q (e)</b> |
|-------------------------------|--------------------------------------|---------------------------------|--------------|
| <b>H<sub>2</sub></b>          |                                      |                                 |              |
| H                             | -                                    | -                               | +0.4829      |
| Center of mass                | 36.500                               | 0.282                           | -0.9658      |
| <b>Hydroxyl</b>               |                                      |                                 |              |
| C                             | 28.000                               | 0.340                           | +0.2000      |
| O                             | 78.994                               | 0.310                           | -0.6400      |
| H                             | 30.000                               | 0.131                           | +0.4400      |
| <b>Carbonyl</b>               |                                      |                                 |              |
| O                             | 78.994                               | 0.310                           | -0.5000      |
| C                             | 28.000                               | 0.340                           | +0.5000      |
| <b>Carboxyl</b>               |                                      |                                 |              |
| C                             | 28.000                               | 0.340                           | +0.5500      |
| O (=O)                        | 78.994                               | 0.310                           | -0.5000      |
| O (-O-)                       | 78.994                               | 0.310                           | -0.5800      |
| H                             | 30.000                               | 0.131                           | +0.4500      |
| <b>Pyrrolic-N</b>             |                                      |                                 |              |
| C (CN)                        | 28.000                               | 0.340                           | +0.31        |
| N                             | 60.388                               | 0.3296                          | -0.96        |
| H (NH)                        | 30.000                               | 0.131                           | +0.46        |
| <b>Pyridinic-N oxide</b>      |                                      |                                 |              |
| C (CN)                        | 28.000                               | 0.340                           | +0.34        |
| N                             | 60.388                               | 0.3296                          | -0.52        |
| O (NO)                        | 78.994                               | 0.31                            | -0.47        |
| <b>Quaternary-N</b>           |                                      |                                 |              |
| C (CN)                        | 28.000                               | 0.340                           | +0.37        |
| N                             | 60.388                               | 0.3296                          | -1.17        |

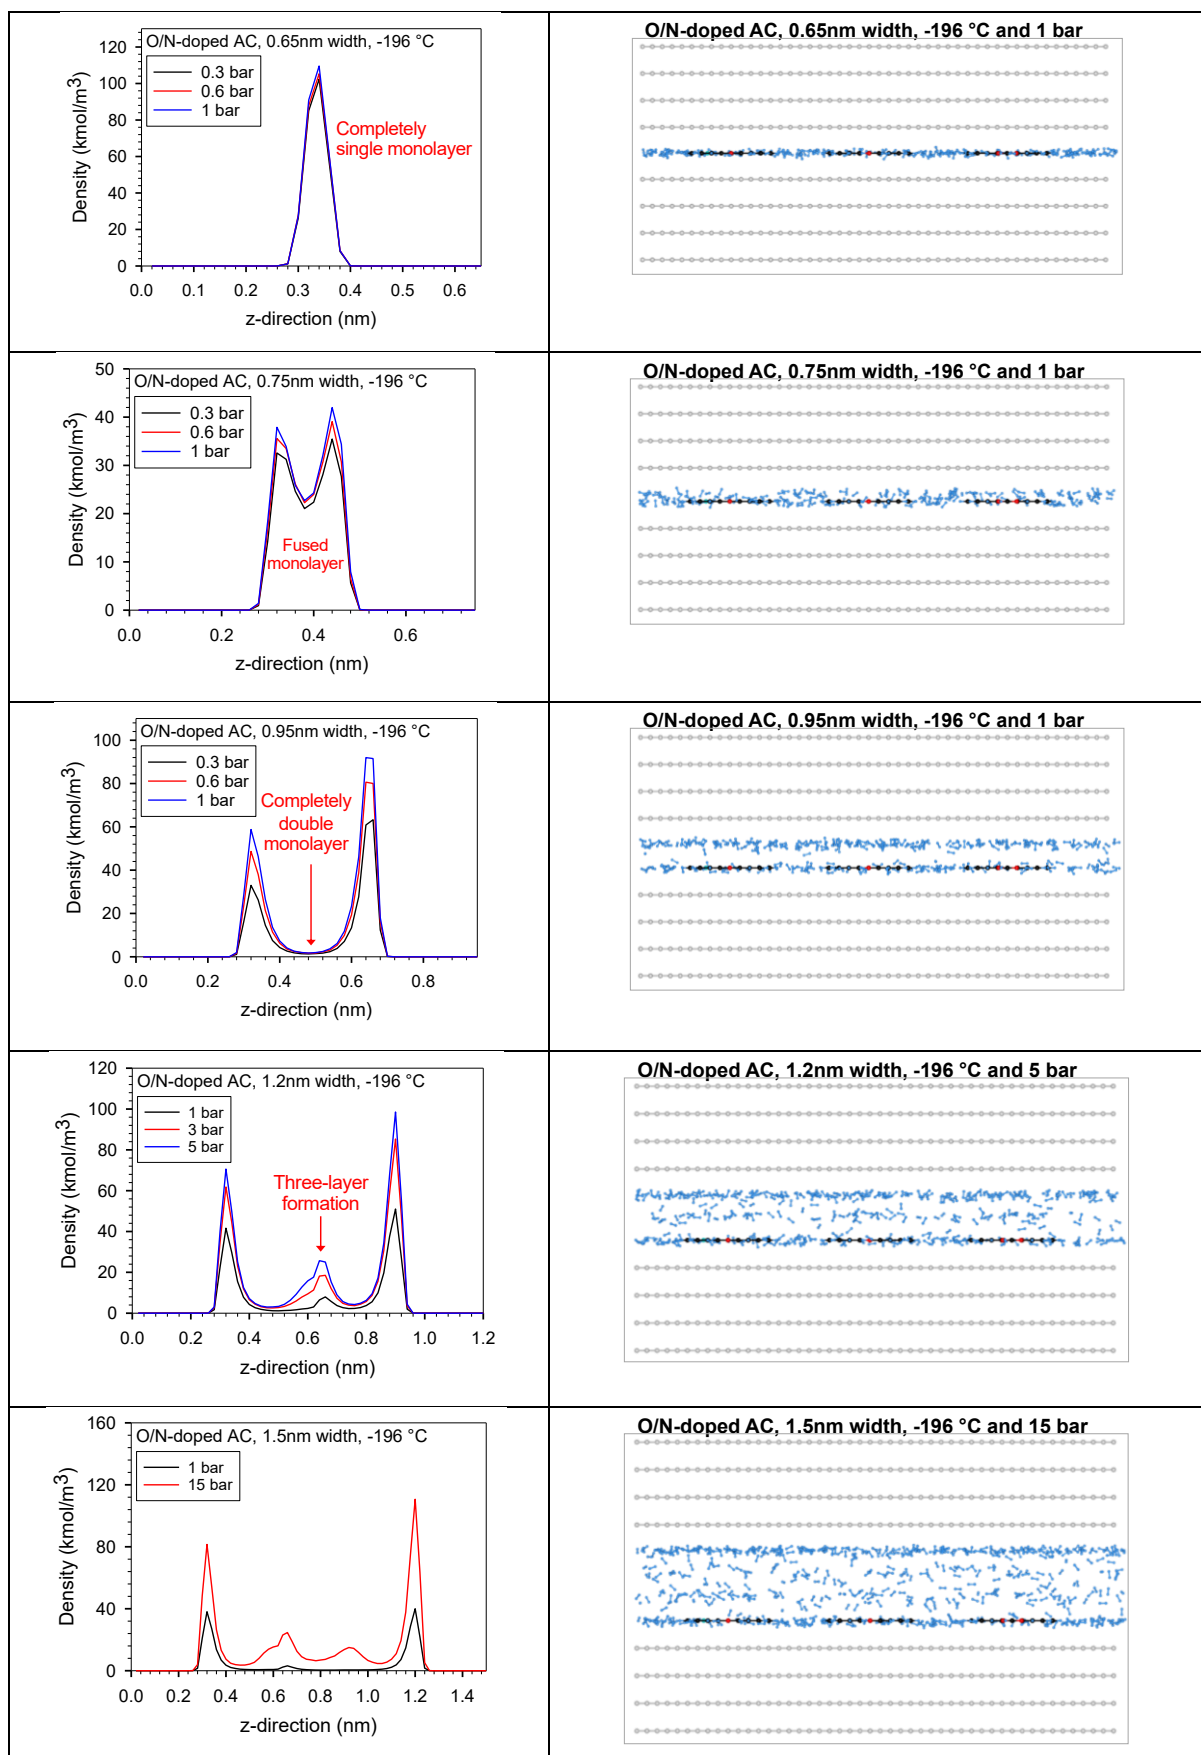

**Figure S1.** Local density distributions and snapshots of  $H_2$  on various pore widths and pressures at  $-196^\circ\text{C}$ .

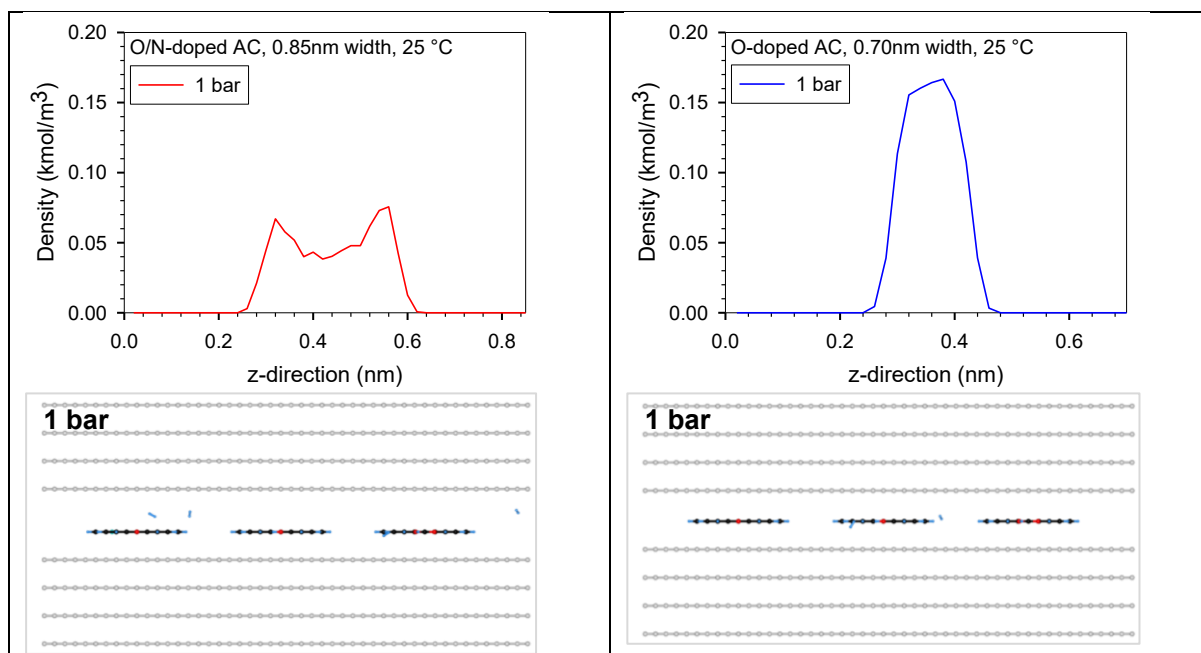

**Figure S2.** Local density distributions and snapshots of  $H_2$  adsorption in O/N-doped AC model (0.85 nm width) and O-doped AC model (0.70 nm width) at 25°C.

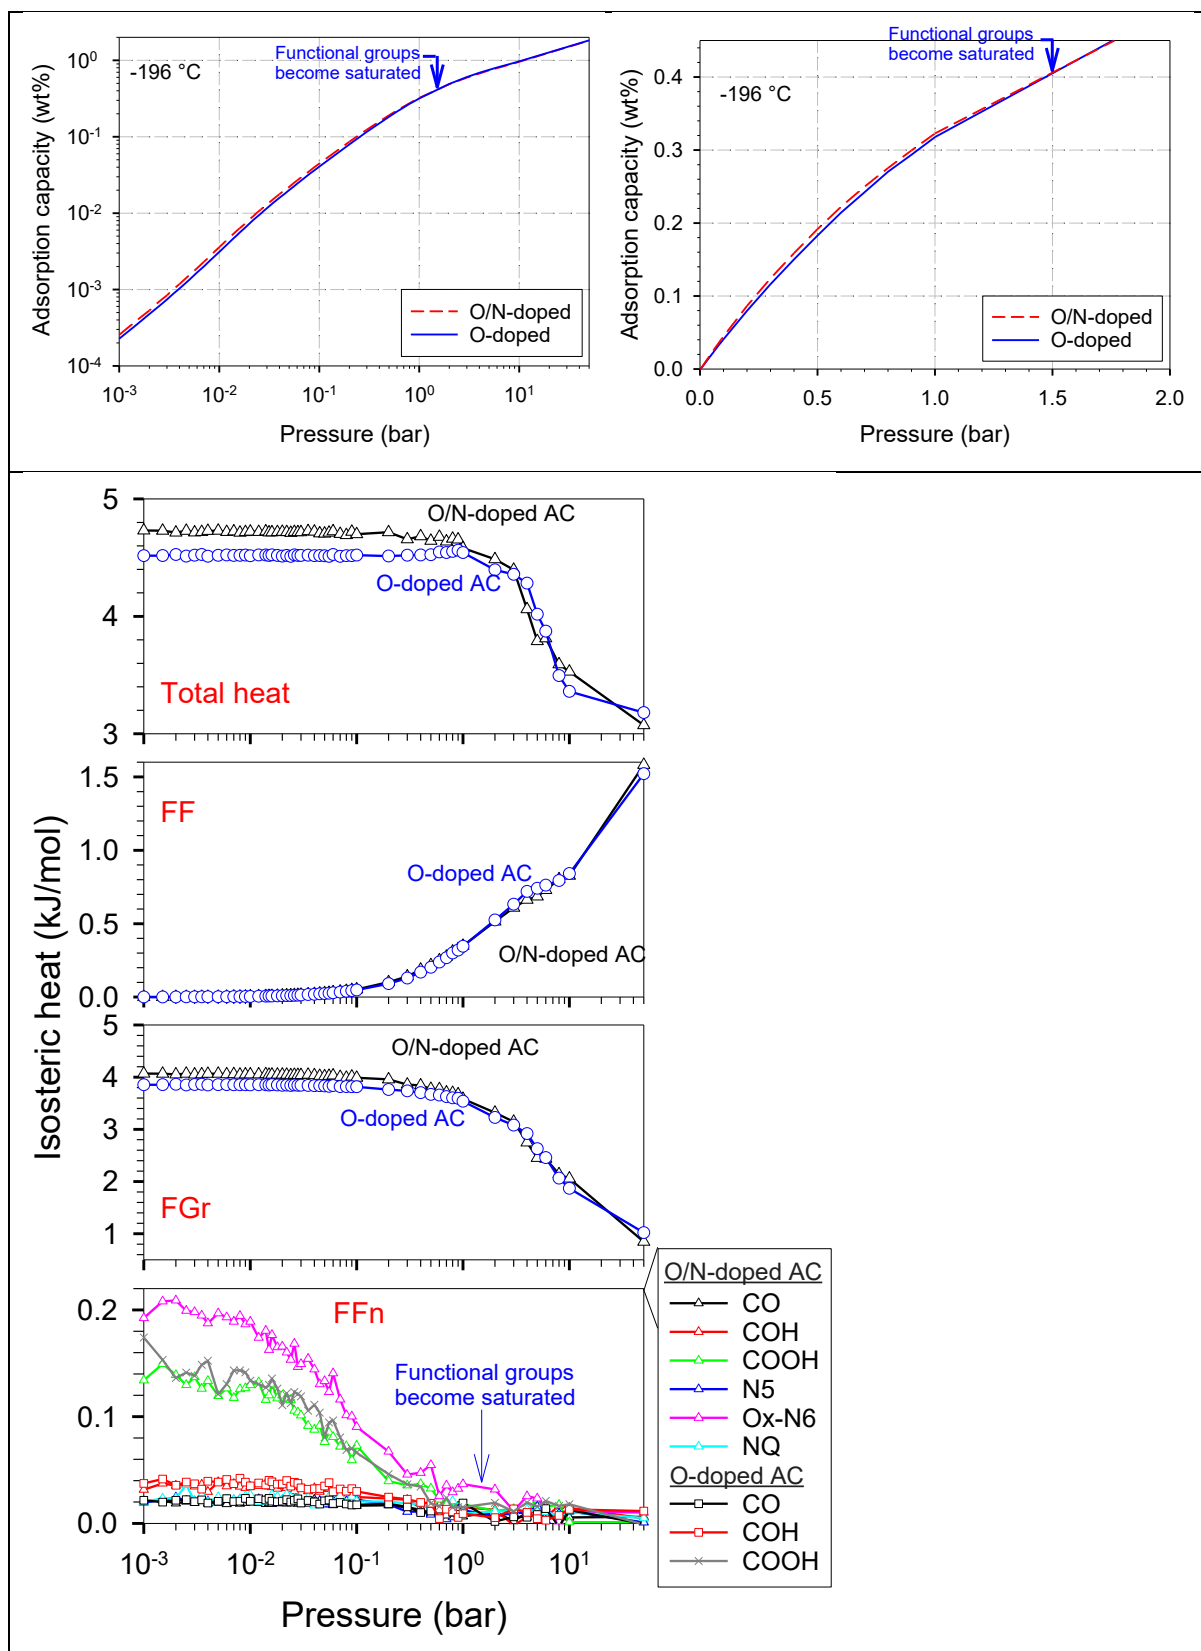

**Figure S3.** Isotherms and isosteric heats of H<sub>2</sub> adsorption in O/N-doped AC model and O-doped AC model at -196°C obtained with GCMC.
